# Supplementary material for: Intracellular Uptake: A Possible Mechanism for Silver Engineered Nanoparticle Toxicity to a Freshwater Alga Ochromonas danica
Source: PLoS One. 2010 Dec 22;5(12):e15196. doi: 10.1371/journal.pone.0015196 (PMC3008680; doi:10.1371/journal.pone.0015196)
Supplement: Table S1 — Compounds and their concentrations in the modified DY-V medium used in this study. (DOC) [file pone.0015196.s006.doc]

Table S1. Compounds and their concentrations in the modified DY-V medium used in this study.

| Compounds | Final Concentration |  | Compounds | Final Concentration |
| --- | --- | --- | --- | --- |
| 2-(*N*-morpholino)ethanesulfonic acid | 1.02 mM |  | Na2EDTA • 2H2O | 21.5 μM |
| MgSO4 • 7H2O | 203 μM |  | FeCl3 • 6 H2O | 3.70 μM |
| KCl | 40.2 μM |  | MnCl2 • 4H2O | 1.01 μM |
| NH4Cl | 50.1 μM |  | ZnSO4 • 7H2O | 139 nM |
| NaNO3 | 235 μM |  | CoCl2 • 6H2O | 33.6 nM |
| Na2 β-  glycerophosphate | 10.0 μM |  | Na2MoO4 • 6H2O | 82.7 nM |
| H3BO3 | 12.9 μM |  | Na3VO4 • 10H2O | 5.49 nM |
| Na2SiO3 • 9 H2O | 49.3 μM |  | H2SeO3 | 23.1 nM |
| CaCl2 • 2 H2O | 676 μM |  | thiamine · HCl | 296 nM |
| 3-(N-morpholino)propanesulfonic acid | 2 mM |  | biotin | 2.05 nM |
| Yeast extract | 0.5 g/l |  | cyanocobalamin | 0.369 nM |
| glucose | 1 mM |  |  |  |
